# Supplementary material
Source: PubMed Central journal article supplement (PMC2040466)
Supplement: pnas_0707753104_1.pdf [file pnas_0707753104_1.pdf]

**Table 2. P1 and N170 inversion effects for face stimuli**

|            |                |                                                 | Adults               |              |              |                        |
|------------|----------------|-------------------------------------------------|----------------------|--------------|--------------|------------------------|
| References | Subjects, N    | Task                                            | P1 Latency           | P1 Amplitude | N170 Latency | N170 Amplitude         |
| 1          | 12             | Mental counting irrelevant target (butterflies) | -                    | -            | N*           | N <sup>NS</sup> (R>L)  |
| 2          | 9              | Passive viewing                                 | N**                  | N**          | N**          | N***                   |
| 3          | 14 (M=25 yrs)  | Matching identity of target face to prime face  | N <sup>NS</sup>      | A            | N**          | N*** (R>L*)            |
| 4          | 14 (M=25 yrs)  | Orientation-decision                            | -                    | -            | N***         | N***                   |
| 5*         | 15 (18-30 yrs) | Exp1: Detecting hands                           | -                    | -            | N*           | N <sup>NS</sup> (R>L*) |
|            |                | Exp2: Detecting face repetitions                | -                    | -            | N***         | N***                   |
| 6          | 11 (19-26 yrs) | Passive viewing                                 | -                    | -            | N*           | N*                     |
| 7†         | 16 (19-37 yrs) | Mental counting of irrelevant target (flowers)  | -                    | -            | N***         | N (R>L*)               |
| 8          | 38 (M=28 yrs)  | Press key to irrelevant target (checkerboard)   | -                    | -            | N^           | N^                     |
| 9          | 11 (19-42 yrs) | Passive viewing                                 | -                    | -            | N*           | N** (R>L**)            |
| 10         | 34 (20-33 yrs) | Recognition memory for repeated faces           | N***                 | A            | N***         | N***                   |
| 11         | 18 (19-41 yrs) | Gender decision                                 | -                    | N^           | -            | N^                     |
| 12‡        | 13 (M=25 yrs)  | Orientation-decision                            | A                    | -            | N** (R<L''') | P <sup>NS</sup>        |
| 13         | 16 (21-33 yrs) | Press key to irrelevant target (checkerboard)   | N**                  | N* (R>L**)   | N***         | N*                     |
| 14         | 36 (20-33 yrs) | Recognition of repeated faces in study and test | N***                 | N***         | N***         | N***                   |
| 15         | 24 (19-51 yrs) | Detection of human faces in scenes.             | -                    | -            | N***         | N***                   |
| 16         | 12 (18-26 yrs) | Orientation-decision                            | -                    | -            | N**          | N*                     |
| 17         | 16 (18-39 yrs) | Press key to irrelevant target (butterfly)      | -                    | -            | -            | N***                   |
| 18         | 16 (18-27 yrs) | Matching identity to name celebrity             | -                    | -            | -            | N***                   |
| 19         | 11             | Press key for gray fixation cross               | -                    | -            | N**          | N*                     |
|            |                |                                                 | Infants and Children |              |              |                        |
| 8          | 15 (4-5 yrs)   | Press key to irrelevant target (checkerboard)   | -                    | -            | A^           | P^                     |
|            | 15 (6-7 yrs)   | Idem                                            | -                    | -            | P^           | A^                     |
|            | 15 (8-9 yrs)   | Idem                                            | -                    | -            | P^           | P^                     |
|            | 15 (10-11 yrs) | Idem                                            | -                    | -            | A^           | N^                     |
|            | 15 (12-13 yrs) | Idem                                            | -                    | -            | N^           | N^                     |
|            | 15 (14-15 yrs) | Idem                                            | -                    | -            | N^           | N^                     |
| 20¥        | 25 (3 mths)    | Passive viewing                                 | -                    | -            | A            | A                      |
| 9          | 17 (6 mths)    | Passive viewing                                 | -                    | -            | A            | A                      |
| 20¥        | 26 (12 mths)   | Passive viewing                                 | -                    | -            | A            | N*                     |
| 21*        | 16 (8-9 yrs)   | Recognition memory for repeated faces           | N^                   | N^           | N^           | A                      |
|            | 14 (10-11 yrs) | Idem                                            | N^                   | N^           | N^           | A                      |
|            | 15 (12-13 yrs) | Idem                                            | N^                   | N^           | N^           | N^                     |
|            | 13 (14-16 yrs) | Idem                                            | N^                   | N^           | N^           | N^                     |

**References**

- Bentin S, Allison T, Puce A, Perez A, McCarthy G (1996). *J Cognit Neurosci* 8: 551-565.
- Linkenkaer-Hansen K, Palva JM, Sams M, Hietanen JK, Aronen HJ, Ilmoniemi RJ (1998). *Neurosci Lett* 253: 147-150.
- Rossion B, Delvenne JF, Debatisse D, Goffaux V, Bruyer R, Crommelinck M, Guerit JM (1999). *Biol Psychol* 50 : 173-189.
- Rossion B, Gauthier I, Tarr MJ, Despland P, Bruyer R, Linotte S, Crommelinck M (2000). *NeuroReport* 11: 69-74.
- Eimer M (2000). *Clin Neurophysiol* 111 : 694-705.
- Rebai M, Poiroux S, Bernard C, Lalonde R (2001). *Int J Neurosci* 106 : 227-238.
- Sagiv N, Bentin, S (2001). *J Cognit Neurosci* 13: 937-951
- Taylor MJ, Edmonds GE, McCarthy G, Allison T (2001). *Neuroreport* 12 : 1671.1676.
- de Haan M, Pascalis O, Johnson MH (2002). *J Cognit Neurosci* 14 : 199-209.

10. Itier RJ, Taylor MJ (2002). *NeuroImage* 15 : 353-372.
11. Milivojevic B, Clapp WC, Johnson BW, Corballis MC (2003). *Psychophysiology* 40 : 967-978.
12. Goffaux V, Gauthier I, Rossion B (2003). *Cognit Brain Res* 16 : 416-424.
13. Itier RJ, Taylor MJ (2004). *Cereb Cortex* 14 : 132-142.
14. Itier RJ, Taylor MJ (2004). *NeuroImage* 21 : 1518-1532.
15. Rousselet GA, Mace MJ, Fabre-Thorpe M (2004). *J Vis* 4 : 13-21.
16. Stekelenburg JJ, de Gelder B (2004). *NeuroReport* 15 : 777-780.
17. Schweinberger SR, Huddy V, Burton AM (2004). *NeuroReport* 15: 1501-1505.
18. Carbon CC, Schweinberger SR, Kaufman JM, Leder H (2005). *Cognit Brain Res* 24 : 544-555.
19. de Gelder B, Stekelenburg JJ (2005). *Neurosci Lett* 376 : 40-45.
20. Halit H, de Haan M, Johnson MH (2003). *NeuroImage* 19 : 1180-1193.
21. Itier RJ, Taylor MJ (2004). *J Cognit Neuroscience* 16: 487-502.

## Legend

N=normal inversion (inverted > upright);

A=inversion absent (no difference inverted-upright);

P=Paradoxical inversion (upright > inverted); - = Not reported.

^ = Numerical difference but no P-value is mentioned for specific comparison;

\* =  $p < 0.05$ ; \*\* =  $p < 0.01$ ; \*\*\* =  $p < 0.001$ ; NS =  $p > 0.05$ .

R>L = A significant Orientation x Hemisphere interaction is reported: inversion larger on right hemisphere electrodes than left.

\* Inversion effects were not significant when participants had to detect digits superimposed on faces.

† Results are shown for photographic stimuli (N170 amplitude comparison upright - inverted;  $p = 0.055$ )

‡ Results are shown for broadband stimuli. In contrast to the broadband condition,

in the high spatial frequency condition, normal inversion was found on the N170 amplitude ( $P < 0.01$ )

¥ The ERP analyzed (N290) is a face-sensitive component in infants which may relate to the adult N170.

• Normal inversion was found for P1 and N170 latency ( $p < 0.001$ ) irrespective of age group;

The inversion effect on the N170 amplitude was near significance for age group 14-16.

When adults were included in these analyses, the interaction age x face-type became significant.
